# Supplementary material for: Ladder-like polysilsesquioxane dielectrics for organic field-effect transistor applications
Source: Royal Society of Chemistry journal article supplement (doi:10.1039/c7tc02278f), 2017-01-01
Supplement: c7tc02278f1.pdf [file c7tc02278f1.pdf]

Electronic Supplementary Information

# Ladder-Like Polysilsesquioxane Dielectrics for Organic Field-Effect Transistor Applications

*M. Pei,<sup>a,†</sup> A. S. Lee,<sup>b,†</sup> S. S. Hwang<sup>b,\*</sup> and H. Yang<sup>a,\*</sup>*

<sup>a</sup>Department of Applied Organic Materials Engineering, Inha University, Incheon 22212,

Korea; <sup>b</sup>Materials Architecturing Research Center, Korea Institute of Science and

Technology, Seoul 02972, Korea

## Corresponding Author

\*H. Yang (hcyang@inha.ac.kr); S.S. Hwang (sshwang@kist.re.kr)

<sup>†</sup>M. P. and A. S. L. contributed equally.

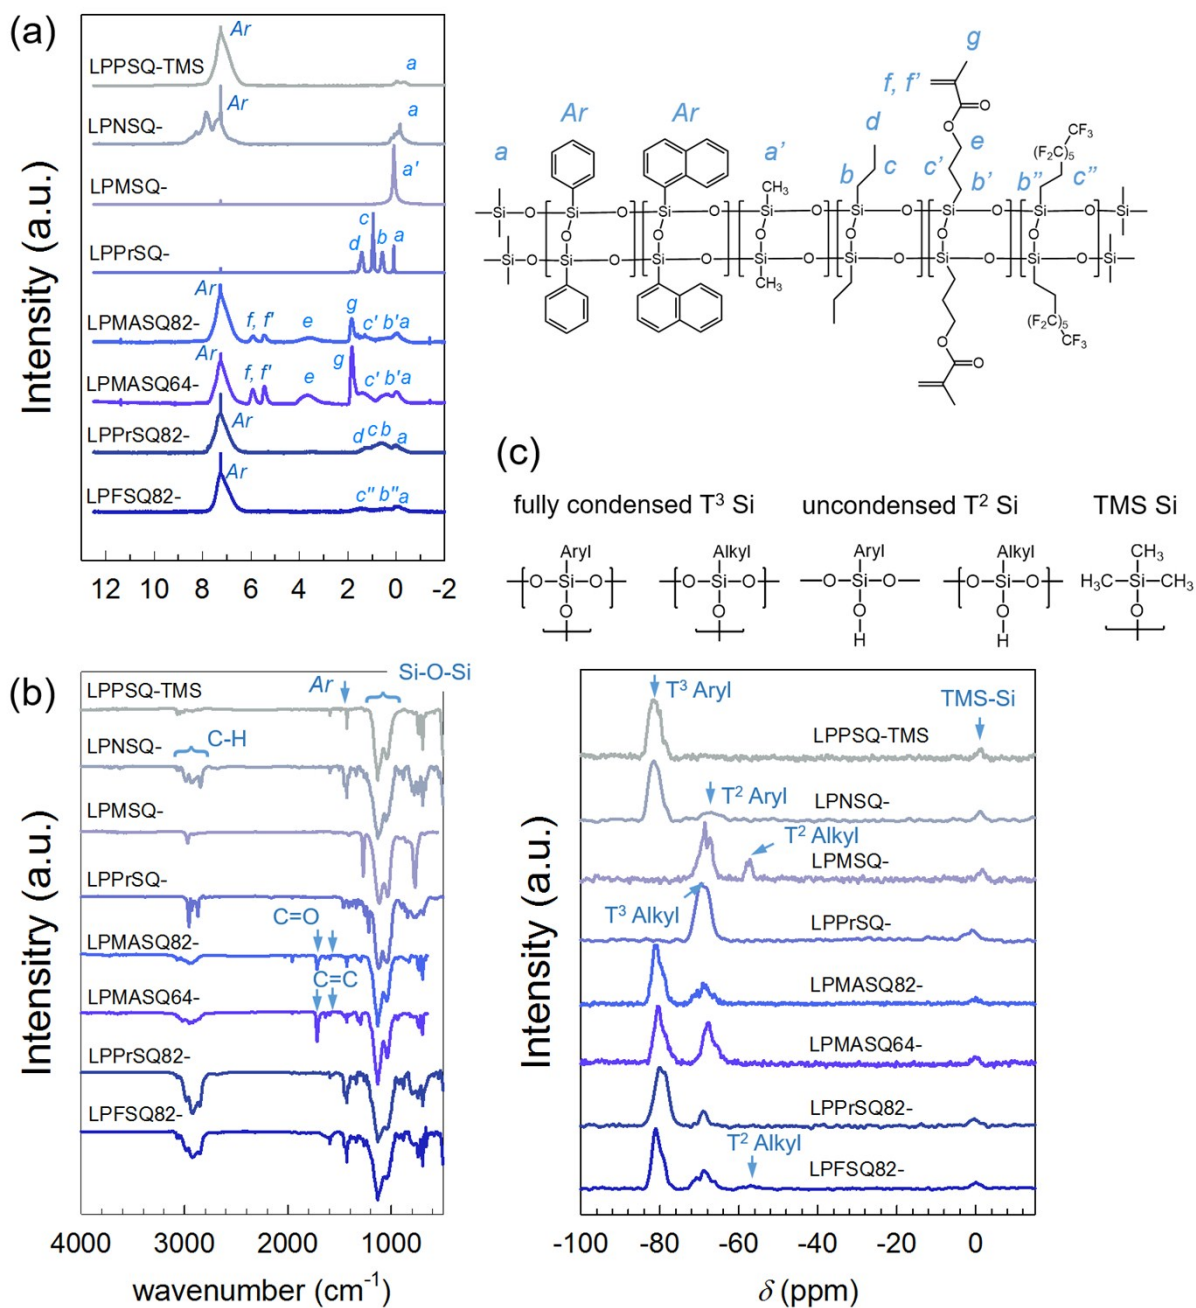

Fig. S1 (a) <sup>1</sup>H NMR, (b) FT-IR, and (c) <sup>29</sup>Si NMR spectra of LPSQ-TMS series studied in this paper.

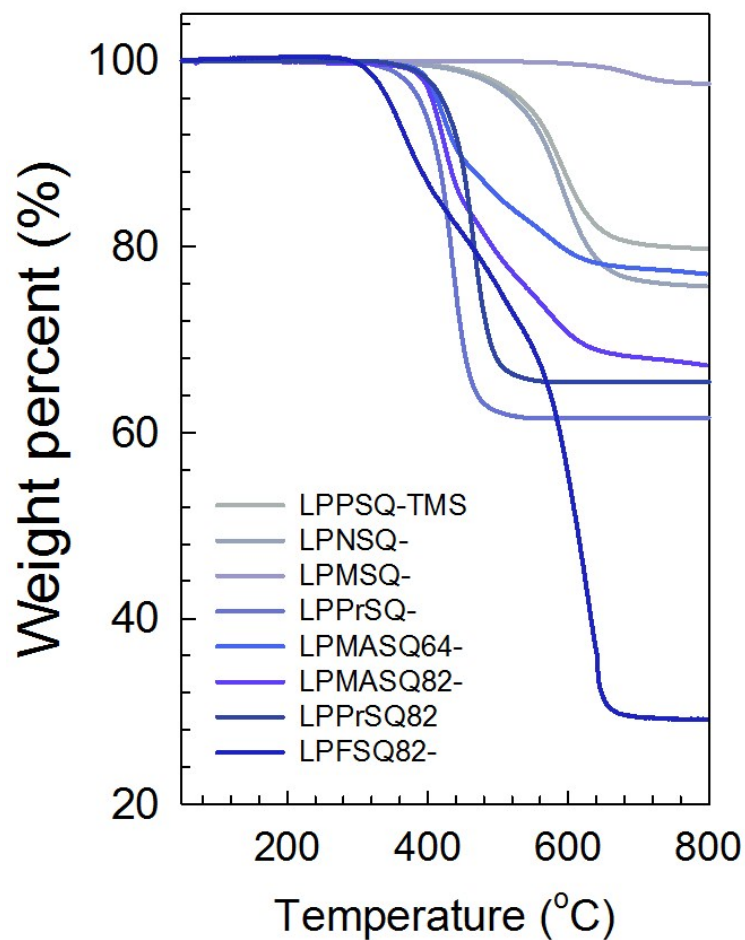

Fig. S2 TGA profiles of LPSQ-TMS series studied in this work.

|                                                  | LPSQ-TMS treated SiO <sub>2</sub>                                                   |                                                                                     |                                                                                     |                                                                                     |                                                                                     |                                                                                      |                                                                                       |                                                                                       | untreated SiO <sub>2</sub> |
|--------------------------------------------------|-------------------------------------------------------------------------------------|-------------------------------------------------------------------------------------|-------------------------------------------------------------------------------------|-------------------------------------------------------------------------------------|-------------------------------------------------------------------------------------|--------------------------------------------------------------------------------------|---------------------------------------------------------------------------------------|---------------------------------------------------------------------------------------|----------------------------|
|                                                  | LPPSQ-                                                                              | LPM82-                                                                              | LPM64-                                                                              | LPMSQ-                                                                              | LPPrSQ-                                                                             | LPPrSQ82-                                                                            | LPFSQ82-                                                                              | LPNSQ-                                                                                |                            |
| Liquid Contact                                   |                                                                                     |                                                                                     |                                                                                     |                                                                                     |                                                                                     |                                                                                      |                                                                                       |                                                                                       |                            |
| H <sub>2</sub> O                                 | 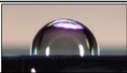 |  |  |  |  |  |  |  |                            |
| $\theta_{\text{H}_2\text{O}}$ (°)                | 95.7                                                                                | 92.8                                                                                | 91.3                                                                                | 108.1                                                                               | 105.2                                                                               | 97.2                                                                                 | 113.0                                                                                 | 99.5                                                                                  | 39.3                       |
| CH <sub>2</sub> I <sub>2</sub>                   |  |  |  |  |  |  |  |  |                            |
| $\theta_{\text{CH}_2\text{I}_2}$ (°)             | 37.5                                                                                | 45.5                                                                                | 53.9                                                                                | 75.2                                                                                | 71.7                                                                                | 40.3                                                                                 | 81.4                                                                                  | (dissolved)                                                                           | 46.4                       |
| Surface energy ( $\gamma$ ; mJ m <sup>-2</sup> ) |                                                                                     |                                                                                     |                                                                                     |                                                                                     |                                                                                     |                                                                                      |                                                                                       |                                                                                       |                            |
| non-polar ( $\gamma^d$ )                         | 41.9                                                                                | 36.2                                                                                | 30.2                                                                                | 19.9                                                                                | 21.6                                                                                | 40.7                                                                                 | 16.9                                                                                  | N/A                                                                                   | 24.0                       |
| polar ( $\gamma^p$ )                             | 0.10                                                                                | 0.80                                                                                | 1.80                                                                                | 0.30                                                                                | 0.50                                                                                | 0.05                                                                                 | 0.20                                                                                  | N/A                                                                                   | 33.6                       |
| $\gamma$ (= $\gamma^d$ + $\gamma^p$ )            | 42.0                                                                                | 37.0                                                                                | 32.0                                                                                | 20.2                                                                                | 22.1                                                                                | 40.75                                                                                | 17.1                                                                                  | N/A                                                                                   | 57.6                       |

Fig. S3  $\theta$ -based  $\gamma$  values of LPSQ-TMS treated and untreated SiO<sub>2</sub> dielectrics.

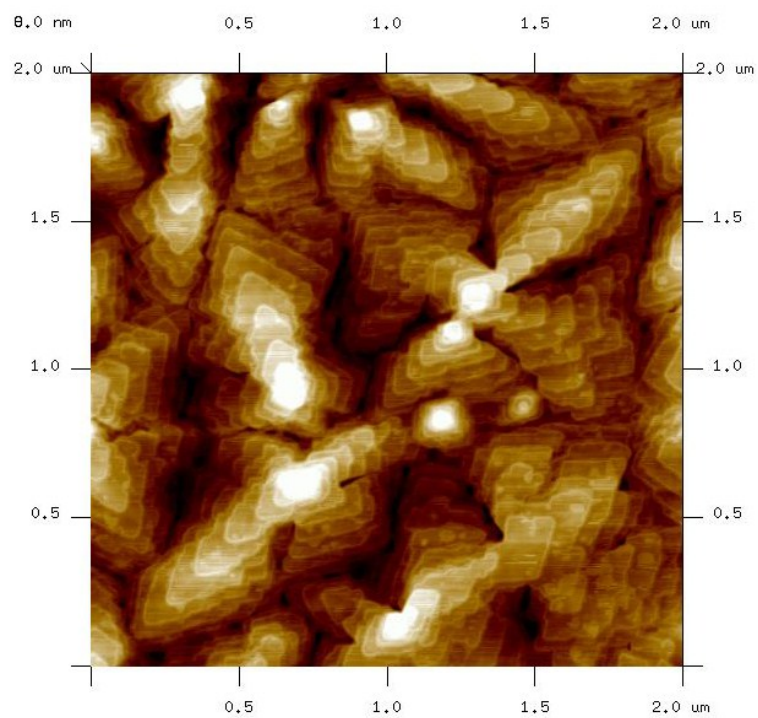

Fig. S4 AFM topography of 20 nm thick pentacene film on the LPMASQ82-TMS treated  $\text{SiO}_2$  surface.

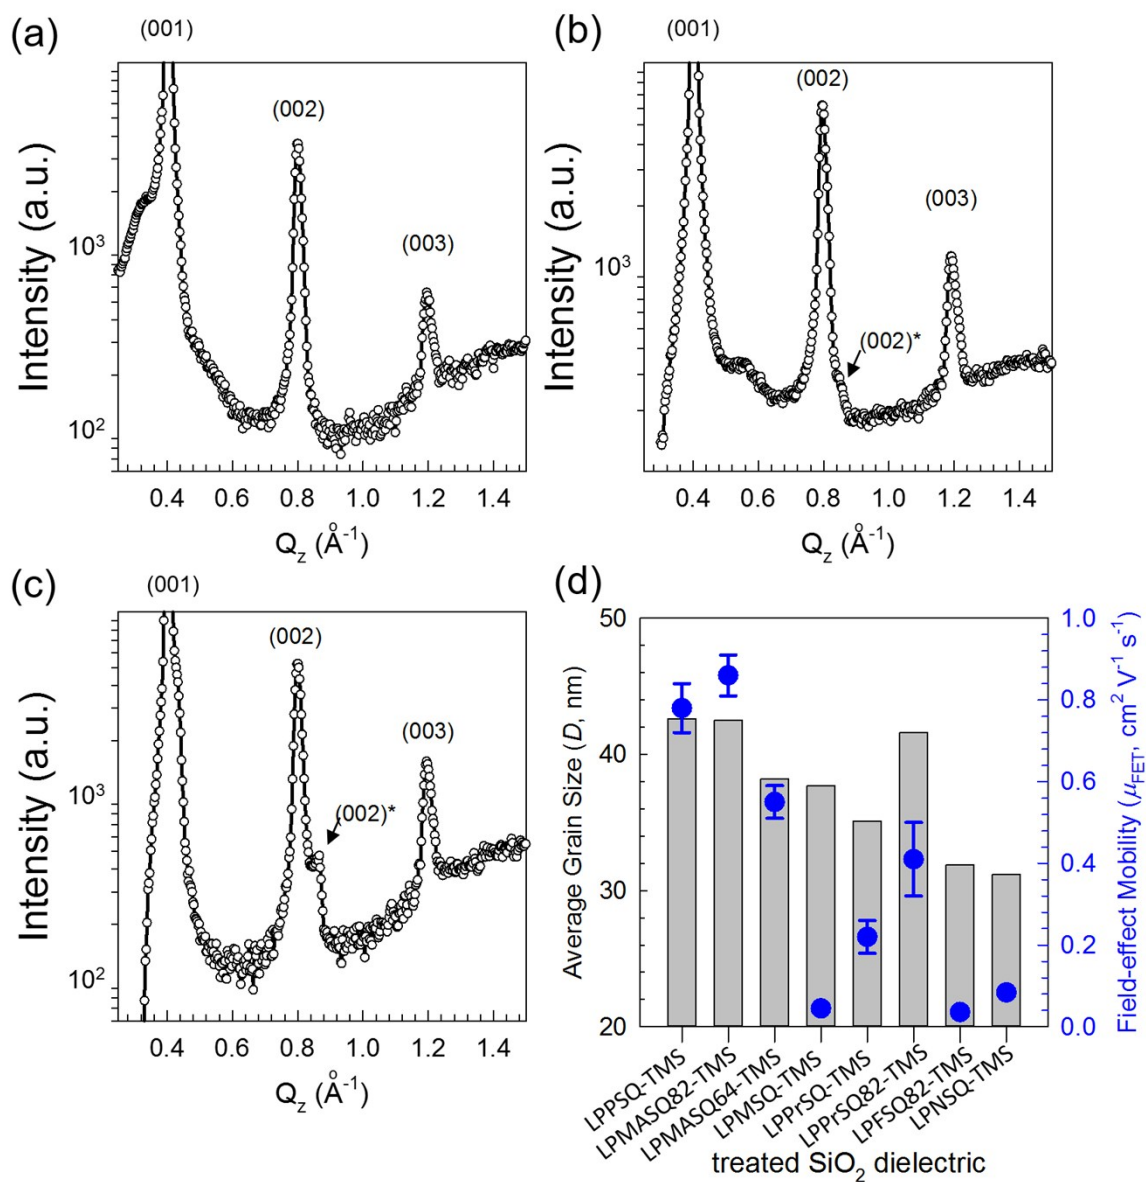

Fig. S5 (a–c) 1D out-of-plane X-ray diffraction profiles extracted along the  $Q_z$  axis from the 2D GIXD patterns of (a) LPMASQ82-, (b) LPPrSQ82-, (c) LPNSQ-TMS treated  $\text{SiO}_2$  systems. (d) Variations in  $D$  and  $\mu_{\text{FET}}$  of 50 nm thick pentacene films on the LPSQ-treated  $\text{SiO}_2$  dielectrics.

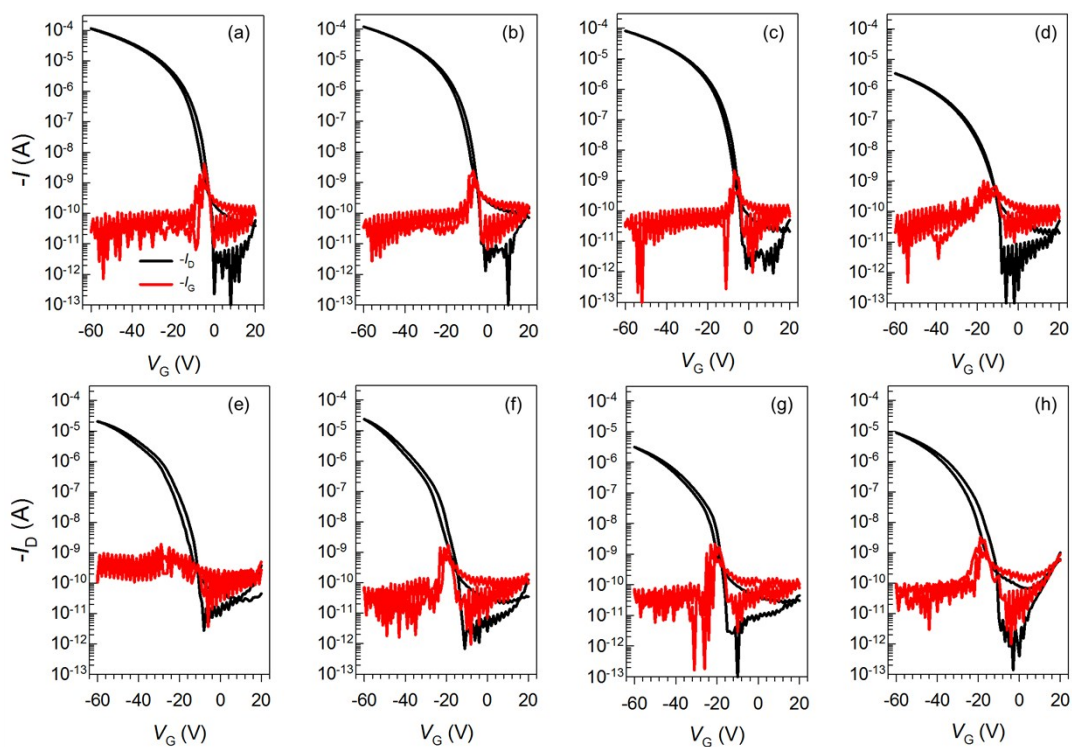

Fig. S6 Typical  $I_D$ - $V_G$  transfer and  $I_G$ - $V_G$  gate leakage curves of pentacene OFETs on the treated  $\text{SiO}_2$  dielectrics including: (a) LPPSQ-, (b) LPMASQ82-, (c) LPMASQ64-, (d) LPMSQ-, (e) LPPrSQ-, (f) LPPrSQ82-, (g) LPFSQ-, and (h) LPNSQ-TMS layers.

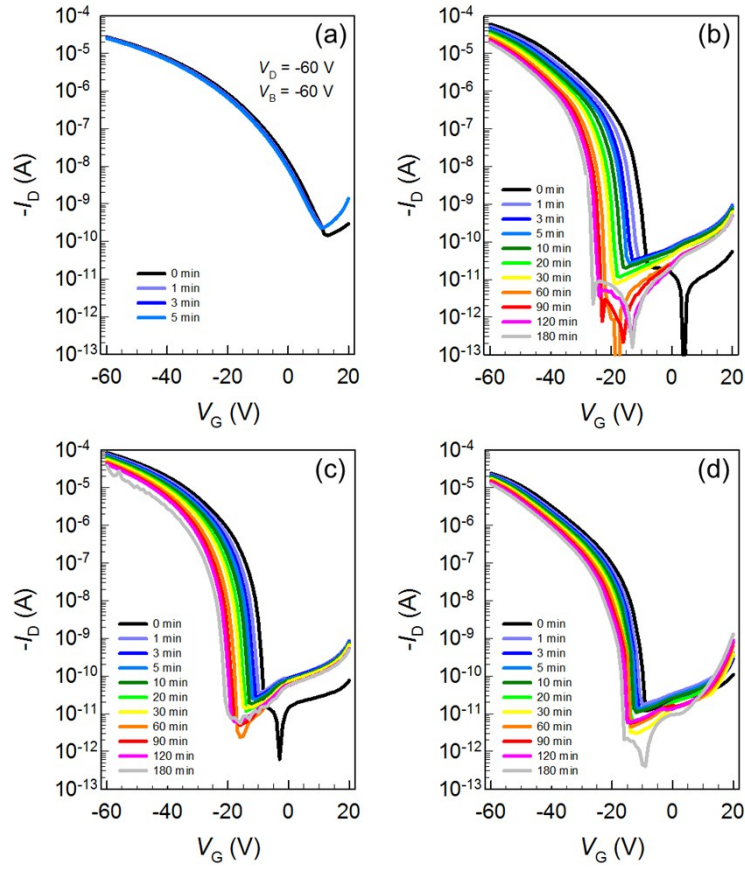

Fig. S7  $I_D$ - $V_G$  transfer curves of 50 nm pentacene OFETs on the (a) untreated and (b–d) LPSQ-TMS treated  $\text{SiO}_2$  dielectrics including: (b) LPPSQ-, (c) LPMASQ82-, and (d) LPPrSQ82-, under a sustained gate bias of  $-60$  V as a function of stress time ( $t$ ).



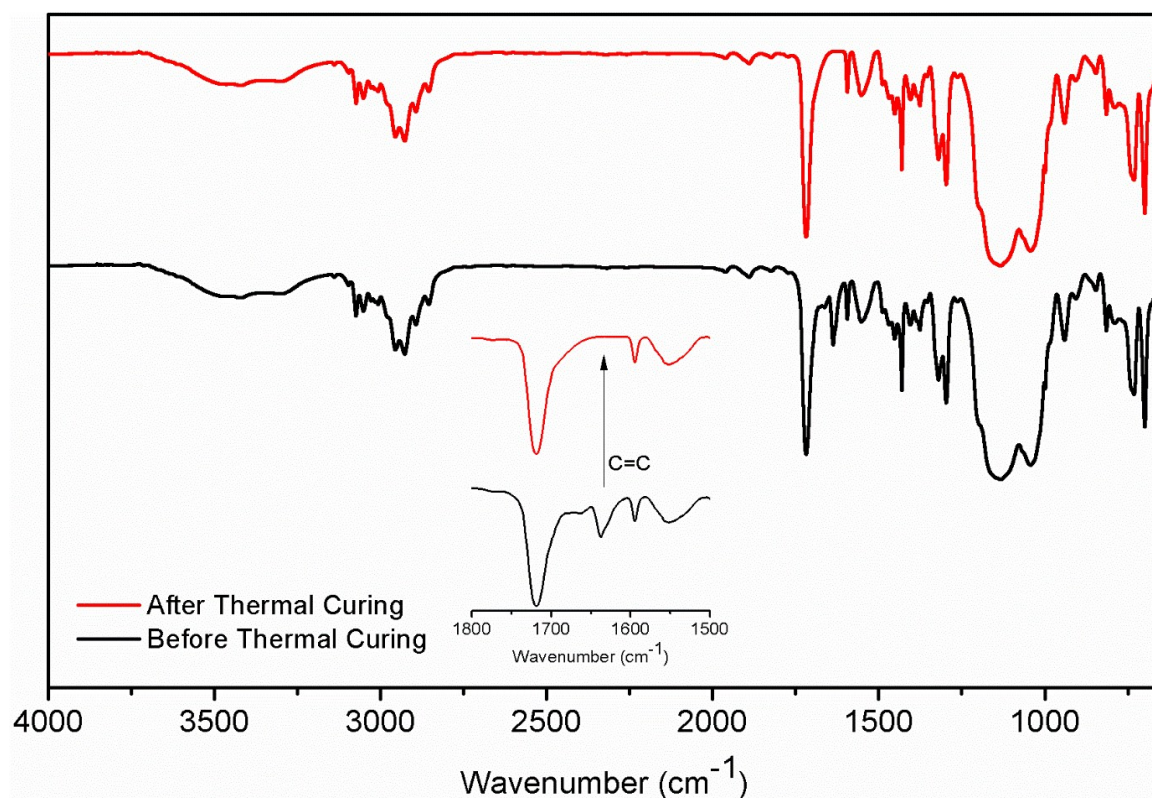

Fig. S8 FT-IR spectra of LPMASQ82-TMS/PMFM (95/5) before and after thermal curing.

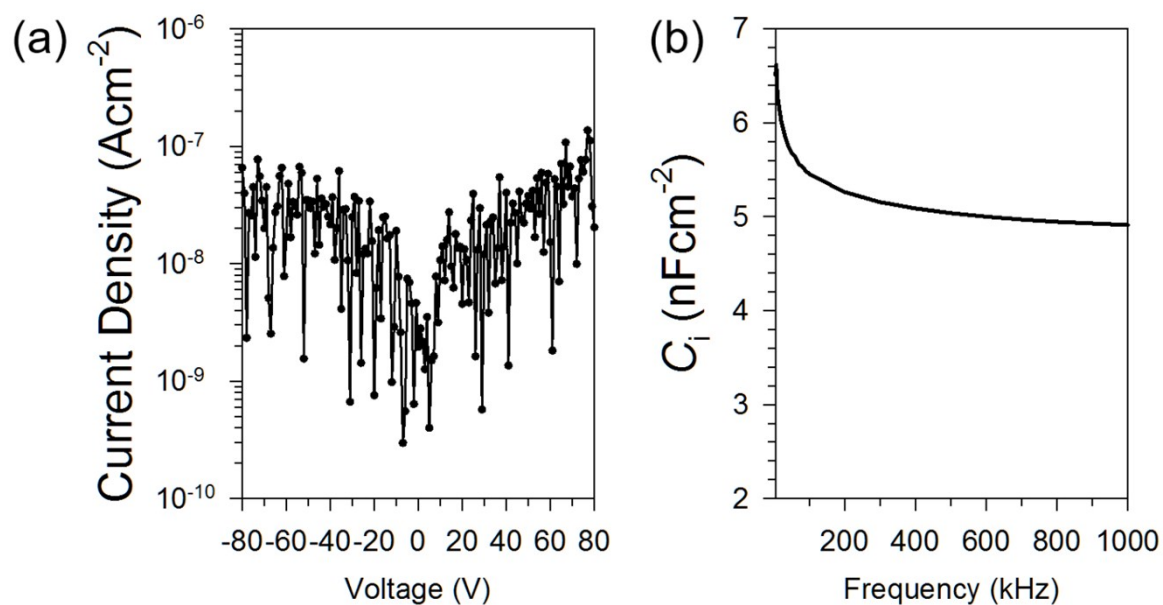

Fig. S9 (a) Current density and (b)  $C_i$  profile of 500 nm thick LPMASQ82-TMS film with  $\varepsilon_r$  of 2.77.



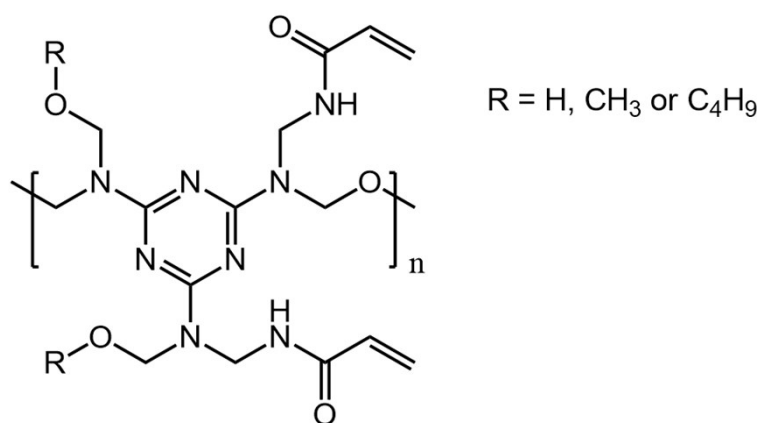

Fig. S10 Chemical structure of poly(melamine-co-formaldehyde), acrylated.
